# Supplementary material for: Gain of function due to increased opening probability by two KCNQ5 pore variants causing developmental and epileptic encephalopathy
Source: PubMed Central journal article supplement — Proc Natl Acad Sci U S A. 2022 Apr 4;119(15):e2116887119. doi: 10.1073/pnas.2116887119 (PMC9169635; doi:10.1073/pnas.2116887119), 2022-04-04
Supplement: pnas.2116887119.sapp.pdf [file pnas.2116887119.sapp.pdf]

## Supplementary Information for

### GAIN-OF-FUNCTION DUE TO INCREASED OPENING PROBABILITY BY TWO KCNQ5 PORE VARIANTS CAUSING DEVELOPMENTAL AND EPILEPTIC ENCEPHALOPATHY

Mario Nappi<sup>a</sup>, Vincenzo Barrese<sup>a</sup>, Lidia Carotenuto<sup>a</sup>, Gaetan Lesca<sup>b</sup>, Audrey Labalme<sup>b</sup>,  
Dorothee Ville<sup>c</sup>, Thomas Smol<sup>d</sup>, Mélanie Rama<sup>d</sup>, Anne Dieux-Coeslier<sup>e</sup>, Clotilde Rivier-  
Ringebach<sup>f</sup>, Maria Virginia Soldovieri<sup>g</sup>, Paolo Ambrosino<sup>h</sup>, Ilaria Mosca<sup>g</sup>, Michael  
Pusch<sup>i</sup>, Francesco Miceli<sup>a#</sup>, and Maurizio Tagliatela<sup>a#\*</sup>

**\*Corresponding Author:** Maurizio Tagliatela, MD PhD. Department of  
Neuroscience, University of Naples “Federico II”, Via Pansini 5, 80131 Naples, ITALY.  
Tel. (+39) 081-7463310; Fax: (+39) 081-7463323. **Email:** mtaglial@unina.it

**This PDF file includes:**

Figures S1 to S2  
Table S1  
SI References

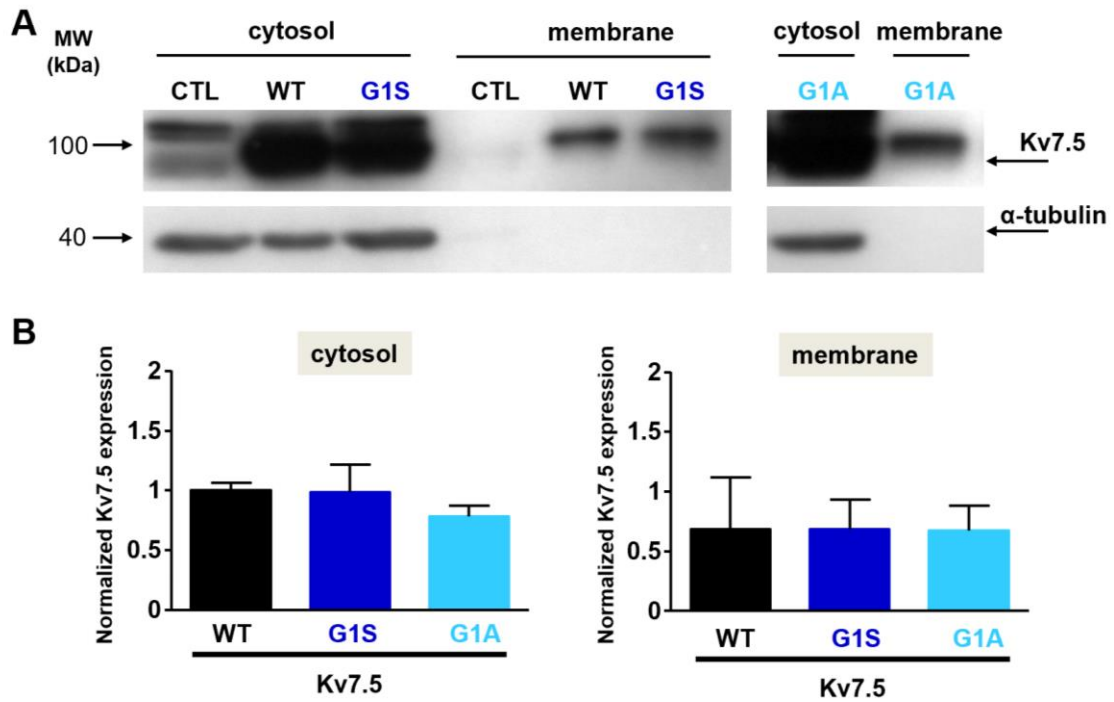

**Figure S1.** Subcellular fractionation of Kv7.5, Kv7.5 G1S or Kv7.5 G1A subunits. (A) Representative Western blot analysis of proteins from cytosol- or plasma membrane-fractions (membrane) from CHO cells transfected with pcDNA3.1 (empty vector, CTL), Kv7.5 (WT), Kv7.5 G1S or Kv7.5 G1A subunits. Lysates were incubated with anti-Kv7.5 antibody (top panels) or anti- $\alpha$ -tubulin antibody (lower panels), as indicated. (B) Quantification of cytosol and membrane Kv7.5 proteins from CHO cells transfected with pcDNA3.1 (empty vector, CTL), Kv7.5 (WT), Kv7.5 G1S or Kv7.5 G1A subunits. Data are expressed as Mean  $\pm$  S.E.M. n=4.

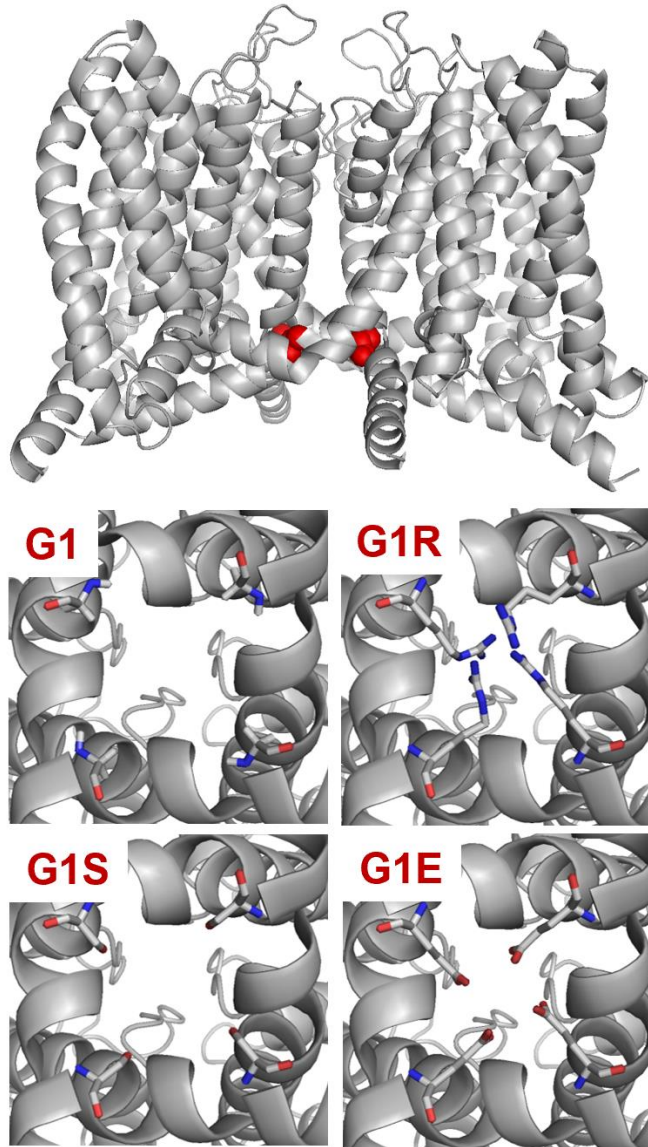

**Figure S2.** Modelling the effects of G1 variants in Kv7.5. The top panel shows a homology model of a Kv7.5 channels, using as template the coordinates of human Kv7.1 in the Activated/Open (AO) state; the G1 residue in the top panel is colored in red using a space-filling model. For clarity only two of the four subunits are shown (top panel). In the bottom panels, enlarged views showing a bottom view of the pore domain of four Kv7.5 subunits in which the residue at position 347 is G (wild-type, G1), S (G1S), R (G1R), or E (G1E).

**Table S1. Available estimates of opening probabilities ( $P_o$ ) and  $i$  single-channel current ( $i$ ) for Kv7.2 and Kv7.5 channels**

| <b>Kv7.2</b>                                  |                                                    |                              |                                          |                  |
|-----------------------------------------------|----------------------------------------------------|------------------------------|------------------------------------------|------------------|
| <b>Opening probability (<math>P_o</math>)</b> | <b>Single channel current (<math>i</math>; pA)</b> | <b>Membrane voltage (mV)</b> | <b>Method</b>                            | <b>Reference</b> |
| 0.17                                          | 0.55                                               | 0                            | Patch-clamp recordings of unitary events | 1                |
| 0.29                                          | 0.75                                               | +20                          | Patch-clamp recordings of unitary events | 2                |
| 0.25                                          | 0.65                                               | +20                          | Patch-clamp recordings of unitary events | 3                |
| 0.13                                          | 0.51                                               | 0                            | Patch-clamp recordings of unitary events | 4                |
| 0.11                                          | 0.57                                               | 0                            | Patch-clamp recordings of unitary events | 5                |
| 0.27                                          | 0.8                                                | Not indicated                | Nonstationary noise analysis             | 6                |
| 0.27                                          | 0.4                                                | +20                          | Nonstationary noise analysis             | Present work     |
| <b>Kv7.5</b>                                  |                                                    |                              |                                          |                  |
| 0.17                                          | 0.19                                               | 0                            | Patch-clamp recordings of unitary events | 1                |
| 0.25                                          | 0.25                                               | +20                          | Nonstationary noise analysis             | Present work     |

## SI References

1. Y. Li, N. Gamper, M. S. Shapiro, Single-channel analysis of KCNQ K<sup>+</sup> channels reveals the mechanism of augmentation by a cysteine-modifying reagent. *J. Neurosci.* **24**, 5079-5090 (2004).
2. M.V. Soldovieri, *et al.*, Atypical gating of M-type potassium channels conferred by mutations in uncharged residues in the S4 region of KCNQ2 causing benign familial neonatal convulsions. *J Neurosci.* **27**, 4919-4928 (2007).
3. A.A. Selyanko, J.K. Hadley, D.A. Brown, Properties of single M-type KCNQ2/KCNQ3 potassium channels expressed in mammalian cells. *J. Physiol.* **534**, 15-24 (2007).
4. Q. Xiong, H. Sun, M. Li. Zinc pyrithione-mediated activation of voltage-gated KCNQ potassium channels rescues epileptogenic mutants. *Nat. Chem. Biol.* **3**, 287-296 (2007).
5. A. Etzioni, *et al.*, Regulation of neuronal M-channel gating in an isoform-specific manner: functional interplay between calmodulin and syntaxin 1A. *J. Neurosci.* **31**, 14158-14171 (2011).
6. X. Li, *et al.*, Molecular basis for ligand activation of the human KCNQ2 channel. *Cell Res.* **31**, 52-61 (2021).
